# Supplementary material
Source: PubMed Central journal article supplement (PMC3966127)
Supplement: hdy2013122x5.pdf [file hdy2013122x5.pdf]

**Supplementary Figure S5.** Evolutionary relationships among X chromosome haplotypes of males inferred using the neighbour-joining method. The distances were computed using the p-distance measure. Bootstrap support is shown if higher than 50% of 1000 replicates.

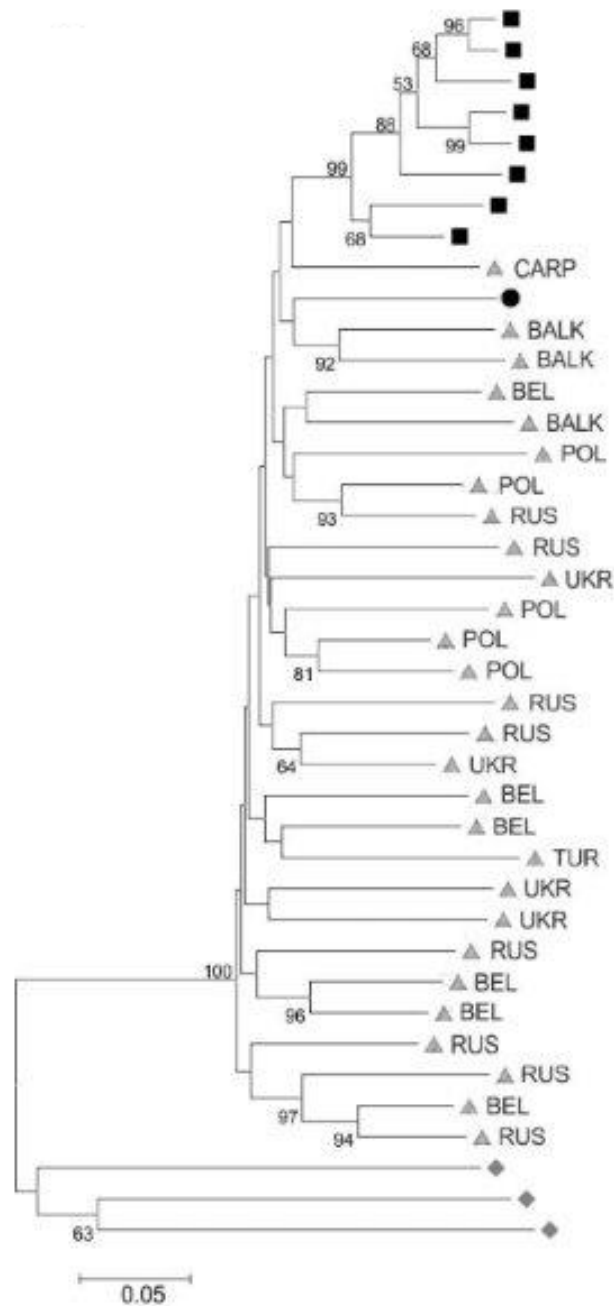

**Legend**

- Iberian wolves
- Italian wolves
- ▲ Eastern European wolves
- ◆ Domestic dogs
- Two haplotypes from one female clustered together
